# Supplementary material for: Interaction between Macrophages and Nanoparticles: In Vitro 3D Cultures for the Realistic Assessment of Inflammatory Activation and Modulation of Innate Memory
Source: PubMed Central journal article supplement (PMC7830034; doi:10.3390/nano11010207), 2021-01-15
Supplement: nanomaterials-11-00207-s001.pdf [file nanomaterials-11-00207-s001.pdf]

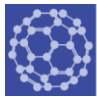

Article

# Interaction between Macrophages and Nanoparticles: In Vitro 3D Cultures for the Realistic Assessment of Inflammatory Activation and Modulation of Innate Memory

Benjamin J. Swartzwelter <sup>1,†</sup>, Alessandro Verde <sup>1</sup>, Laura Rehak <sup>2</sup>, Mariusz Madej <sup>1,‡</sup>, Victor. F. Puentes <sup>3</sup>, Anna Chiara De Luca <sup>1</sup>, Diana Boraschi <sup>1,4,\*</sup> and Paola Italiani <sup>1,4,\*</sup>

<sup>1</sup> Institute of Biochemistry and Cell Biology, National Research Council, 80131 Napoli, Italy; swartzwe@colorado.edu (B.J.S.); alessandro.verde@ibbc.cnr.it (A.V.); mariusz.madej@ocello.nl (M.M.); annachiara.deluca@ibbc.cnr.it (A.L.D.L.)

<sup>2</sup> Athena Biomedical Innovations, 00100 Roma, Italy; laurarehak@gmail.com

<sup>3</sup> Institut Català de Nanociència i Nanotecnologia (ICN2), CSIC and The Barcelona Institute of Science and Technology (BIST), Campus UAB, 08193 Bellaterra, Barcelona, Spain; victor.puentes@icn2.cat

<sup>4</sup> Stazione Zoologica Anton Dohrn, 80121 Napoli, Italy

\* Correspondence: diana.boraschi@ibbc.cnr.it (D.B.); paola.italiani@ibbc.cnr.it (P.I.)

† Current address: Department of Microbiology, Immunology and Pathology, Colorado State University, Fort Collins, CO 80521, USA.

‡ Current address: Ocello B.V., 2333 CH Leiden, The Netherlands.

**Table S1.** Primary cytokine production by monocytes in 2D vs. 3D cultures.

| Culture conditions | Cytokine     | Cytokine production <sup>1</sup> |              |              |              |               |               |
|--------------------|--------------|----------------------------------|--------------|--------------|--------------|---------------|---------------|
|                    |              | Donor 1                          | Donor 2      | Donor 3      | Donor 4      | Donor 5       | Donor 6       |
| <b>2D</b>          |              |                                  |              |              |              |               |               |
| medium             | TNF $\alpha$ | nt <sup>2</sup>                  | 0.06 (0.10)  | 0.21 (0.02)  | 0            | 0             | 0             |
| LPS                |              | nt                               | 0.82 (0.28)  | 1.95 (0.53)  | 3.15 (0.31)  | 3.15 (0.11)   | 15.17 (0.76)  |
| AuNP               |              | nt                               | 0.02 (0.01)  | 0.26 (0.03)  | 0.12 (0.02)  | 0.09 (0.09)   | 0             |
| medium             | IL-6         | 0.24 (0.02)                      | 0.15 (0.04)  | 0.81 (0.09)  | 0            | 0             | 0             |
| LPS                |              | 2.19 (0.19)                      | 1.78 (0.31)  | 3.99 (0.23)  | 2.75 (0.12)  | 6.20 (2.41)   | 6.11 (0.19)   |
| AuNP               |              | 0.25 (0.07)                      | 0.12 (0.03)  | 0.85 (0.11)  | 0            | 0.23 (0.25)   | 0             |
| medium             | IL-8         | 2.43 (0.08)                      | 8.15 (1.70)  | 3.65 (0.02)  | 0.58 (0.14)  | 0.08 (0.11)   | 0.60 (0.02)   |
| LPS                |              | 10.11 (7.50)                     | 22.38 (3.40) | 11.55 (0.80) | 13.88 (1.77) | 18.75 (4.84)  | 81.85 (9.56)  |
| AuNP               |              | 2.41 (0.01)                      | 8.46 (2.40)  | 3.85 (0.07)  | 0.13 (0.03)  | 7.97 (6.72)   | 1.01 (0.42)   |
| medium             | IL-1Ra       | 5.12 (0.85)                      | 3.04 (0.44)  | 4.77 (0.95)  | 1.13 (0.11)  | 0.37 (0.08)   | 1.66 (0.12)   |
| LPS                |              | 4.59 (0.32)                      | 3.88 (1.05)  | 6.20 (1.04)  | 0.98 (0.01)  | 2.60 (0.17)   | 3.05 (0.21)   |
| AuNP               |              | 4.12 (1.13)                      | 3.35 (0.59)  | 5.43 (0.40)  | 0.94 (0.03)  | 0.79 (0.17)   | 1.85 (0.28)   |
| <b>3D</b>          |              |                                  |              |              |              |               |               |
| medium             | TNF $\alpha$ | 0.15 (0.02)                      | 0.05 (0.01)  | 0.30 (0.01)  | 0            | 0             | 0             |
| LPS                |              | 0.93 (0.13)                      | 1.21 (0.18)  | 1.11 (0.18)  | 3.02 (0.13)  | 3.06 (0.54)   | 9.50 (0.44)   |
| AuNP               |              | 0                                | 0.04 (0.01)  | 0.25 (0.04)  | 0.07 (0.01)  | 0.09 (0.08)   | 0             |
| medium             | IL-6         | 0.47 (0.04)                      | 0.19 (0.06)  | 1.66 (0.06)  | 0.05 (0.01)  | 0             | 0.06 (0.04)   |
| LPS                |              | 3.57 (0.11)                      | 2.58 (0.67)  | 3.56 (0.22)  | 2.55 (0.02)  | 3.93 (1.68)   | 4.45 (0.60)   |
| AuNP               |              | 0.42 (0.19)                      | 0.21 (0.08)  | 1.00 (0.09)  | 0.30 (0.03)  | 0.15 (0.15)   | 0.15 (0.09)   |
| medium             | IL-8         | 5.14 (0.10)                      | nt           | 5.61 (0.18)  | nt           | 5.35 (1.58)   | 3.89 (1.50)   |
| LPS                |              | 17.71 (1.70)                     | nt           | 15.26 (0.27) | nt           | 32.88 (11.08) | 121.55 (21.1) |
| AuNP               |              | 4.74 (0.04)                      | nt           | 5.85 (0.07)  | nt           | 12.00 (2.37)  | 9.60 (2.20)   |
| medium             | IL-1Ra       | 3.39 (0.53)                      | 4.99 (1.06)  | 2.94 (0.99)  | 0.52 (0.02)  | 1.60 (0.34)   | 3.14 (1.14)   |
| LPS                |              | 4.17 (0.60)                      | 5.47 (0.28)  | 3.90 (0.23)  | 5.22 (1.20)  | 2.43 (0.66)   | 3.70 (1.04)   |
| AuNP               |              | 6.62 (1.66)                      | 3.75 (1.11)  | 4.68 (2.39)  | 2.53 (0.20)  | 2.22 (0.44)   | 4.44 (1.14)   |

<sup>1</sup> Cytokines were measured in the supernatant of 2D and 3D monocyte cultures exposed to culture medium alone for 24 h. Results are the mean values of 2-8 replicate determinations and are expressed in ng/10<sup>6</sup> cells. SD is shown in parentheses. Undetectable cytokine levels are shown as zero.

<sup>2</sup> nt = not tested

**Table S2.** Baseline cytokine production by unprimed and primed monocytes after 6-day resting in 2D vs. 3D cultures.

| Cytokine     | Cytokine production <sup>1</sup> |                |                |                |                |                |                |                |                |                |                |                |                |                |                |                |                |                |
|--------------|----------------------------------|----------------|----------------|----------------|----------------|----------------|----------------|----------------|----------------|----------------|----------------|----------------|----------------|----------------|----------------|----------------|----------------|----------------|
|              | Unprimed                         |                |                |                |                |                | LPS-primed     |                |                |                |                |                | AuNP-primed    |                |                |                |                |                |
|              | D1                               | D2             | D3             | D4             | D5             | D6             | D1             | D2             | D3             | D4             | D5             | D6             | D1             | D2             | D3             | D4             | D5             | D6             |
| <b>2D</b>    |                                  |                |                |                |                |                |                |                |                |                |                |                |                |                |                |                |                |                |
| TNF $\alpha$ | 0                                | 0              | 0              | 0              | 0              | 0              | 0              | 0              | 0              | 0              | 0              | 0              | 0              | 0              | 0              | 0              | 0              | 0              |
| IL-6         | 0                                | 0              | 0              | 0              | 0              | 0              | 0              | 0              | 0              | 0              | 0              | 0              | 0              | 0              | 0              | 0              | 0              | 0              |
| IL-8         | 0                                | 0              | 0              | 0              | 0              | 0              | 0.14<br>(0.08) | 0              | 0              | 0              | 0.17<br>(0.07) | 0              | 0              | 0              | 0              | 0              | 0.08<br>(0.02) | 0              |
| IL-1Ra       | 0.99<br>(0.72)                   | 0.70<br>(0.17) | 0.49<br>(0.15) | 0.29<br>(0.01) | 0.27<br>(0.11) | 1.07<br>(0.19) | 0.36<br>(0.10) | 0.32<br>(0.16) | 0.37<br>(0.44) | 0.29<br>(0.03) | 0.37<br>(0.48) | 0.09<br>(0.02) | 0.46<br>(0.11) | 0.63<br>(0.10) | 1.18<br>(0.86) | 0.47<br>(0.03) | 0.17<br>(0.06) | 1.41<br>(0.63) |
| <b>3D</b>    |                                  |                |                |                |                |                |                |                |                |                |                |                |                |                |                |                |                |                |
| TNF $\alpha$ | 0                                | 0              | 0              | 0              | 0              | 0              | 0              | 0              | 0              | 0              | 0              | 0              | 0              | 0              | 0              | 0              | 0              | 0              |
| IL-6         | 0                                | 0              | 0              | 0              | 0              | 0              | 0              | 0              | 0.07<br>(0.01) | 0              | 0              | 0              | 0              | 0              | 0              | 0              | 0              | 0              |
| IL-8         | 2.91<br>(0.35)                   | 0.65<br>(0.18) | 2.08<br>(0.05) | 0.58<br>(0.07) | 0              | 0              | 3.48<br>(0.15) | 2.46<br>(0.27) | 3.09<br>(0.28) | 2.70<br>(0.80) | 0.29<br>(0.04) | 2.50<br>(1.59) | 1.38<br>(0.08) | 1.87<br>(0.39) | 2.07<br>(0.10) | 0.76<br>(0.30) | 0              | 0              |
| IL-1Ra       | 4.17<br>(0.39)                   | 0.74<br>(0.44) | 0.67<br>(0.18) | 2.67<br>(2.00) | 0.77<br>(0.32) | 2.33<br>(0.82) | 1.59<br>(0.30) | 1.33<br>(0.04) | 1.37<br>(1.10) | 4.19<br>(1.46) | 1.32<br>(0.33) | 5.74<br>(3.38) | 0.97<br>(0.46) | 1.85<br>(1.30) | 1.50<br>(0.23) | 3.72<br>(1.82) | 0.53<br>(0.19) | 4.86<br>(0.12) |

<sup>1</sup> Cytokines were measured in the supernatant of 2D and 3D monocyte cultures that were previously primed for 24 h with culture medium alone (unprimed) or containing LPS (1 ng/mL) or AuNP (1  $\mu$ g/mL), cultured with culture medium alone for 6 additional days, and eventually exposed for further 24 h to fresh culture medium. Results are the mean values of 2-4 replicate determinations and are expressed in ng/10<sup>6</sup> cells. SD is shown in parentheses. Undetectable cytokine levels are shown as zero.

**Table S3.** Secondary cytokine production by unprimed and primed monocytes challenged with LPS after 6-day resting in 2D vs. 3D cultures.

| Cytokine     | Cytokine production <sup>1</sup> |                 |                  |                  |                  |                 |                             |                  |                  |                  |                  |                  |                  |                  |                 |                  |                  |                |
|--------------|----------------------------------|-----------------|------------------|------------------|------------------|-----------------|-----------------------------|------------------|------------------|------------------|------------------|------------------|------------------|------------------|-----------------|------------------|------------------|----------------|
|              | Unprimed                         |                 |                  |                  |                  |                 | LPS-primed                  |                  |                  |                  |                  |                  | AuNP-primed      |                  |                 |                  |                  |                |
|              | D1                               | D2              | D3               | D4               | D5               | D6              | D1                          | D2               | D3               | D4               | D5               | D6               | D1               | D2               | D3              | D4               | D5               | D6             |
| <b>2D</b>    |                                  |                 |                  |                  |                  |                 |                             |                  |                  |                  |                  |                  |                  |                  |                 |                  |                  |                |
| TNF $\alpha$ | nt <sup>2</sup>                  | 0.08<br>(0.02)  | 0.33<br>(0.02)   | 0.26<br>(0.05)   | 0.19<br>(0.07)   | 4.45<br>(0.19)  | nt                          | 0                | 0.07<br>(0.02)   | 0                | 0.02<br>(0.01)   | 0                | nt               | 0.26<br>(0.06)   | 0.39<br>(0.09)  | 0.26<br>(0.16)   | 0.23<br>(0.03)   | 3.80<br>(0.32) |
| IL-6         | 0.03<br>(0.01)                   | 0.46<br>(0.11)  | 0.17<br>(0.03)   | 0.16<br>(0.01)   | 0.18<br>(0.07)   | 2.72<br>(0.09)  | 0                           | 0.08<br>(0.01)   | 0.03<br>(0.01)   | 0                | 0.03<br>(0.01)   | 0.12<br>(0.08)   | 0.02<br>(0.01)   | 0.54<br>(0.07)   | 0.21<br>(0.04)  | 0.14<br>(0.11)   | 0.18<br>(0.04)   | 2.46<br>(0.08) |
| IL-8         | 8.15<br>(1.10)                   | 13.49<br>(2.72) | 4.38<br>(0.26)   | 5.67<br>(1.19)   | 6.86<br>(4.97)   | 3.10<br>(0.79)  | 1.23<br>(0.47)              | 7.71<br>(2.08)   | 1.35<br>(0.13)   | 4.64<br>(1.74)   | 3.72<br>(1.45)   | 6.30<br>(1.67)   | 6.42<br>(0.69)   | 15.99<br>(2.15)  | 5.22<br>(1.43)  | 4.25<br>(0.41)   | 6.64<br>(0.83)   | 5.15<br>(3.03) |
| IL-1Ra       | 2.10<br>(1.05)                   | 0.88<br>(0.20)  | 0.61<br>(0.23)   | 0.52<br>(0.10)   | 0.58<br>(0.16)   | 3.04<br>(0.46)  | 0.66<br>(0.09)              | 0.20<br>(0.03)   | 0.88<br>(0.11)   | 0.27<br>(0.11)   | 0.23<br>(0.38)   | 0.15<br>(0.06)   | 1.05<br>(0.14)   | 0.87<br>(0.10)   | 1.52<br>(0.68)  | 0.43<br>(0.20)   | 0.62<br>(0.2s2)  | 3.35<br>(0.92) |
| <b>3D</b>    |                                  |                 |                  |                  |                  |                 |                             |                  |                  |                  |                  |                  |                  |                  |                 |                  |                  |                |
| TNF $\alpha$ | nt                               | 0.45*<br>(0.22) | 1.01*<br>(0.06)  | 2.71*<br>(0.28)  | 1.09*<br>(0.32)  | 3.22*<br>(0.30) | nt                          | 0.16*<br>(0.12)  | 0.24*<br>(0.02)  | 0.68*<br>(0.09)  | 0.14*<br>(0.02)  | 1.38*<br>(0.12)  | nt               | 0.66*<br>(0.15)  | 0.33<br>(0.08)  | 1.83*<br>(0.60)  | 0.68*<br>(0.06)  | 4.91<br>(1.54) |
| IL-6         | 0.08<br>(0.05)                   | 0.26<br>(0.16)  | 0.58*<br>(0.04)  | 0.62*<br>(0.07)  | 1.25*<br>(0.52)  | 1.43*<br>(0.03) | 0.39<br>(0.32)              | 0.24<br>(0.15)   | 0.57*<br>(0.24)  | 0.24*<br>(0.10)  | 0.46*<br>(0.05)  | 0.42*<br>(0.04)  | 0.30*<br>(0.12)  | 0.43<br>(0.11)   | 0.24<br>(0.07)  | 0.33<br>(0.14)   | 0.87*<br>(0.06)  | 1.84<br>(0.63) |
| IL-8         | 18.41*<br>(5.40)                 | 15.81<br>(7.33) | 12.77*<br>(2.14) | 18.44*<br>(1.09) | 16.24*<br>(3.88) | 2.11<br>(1.27)  | 26.03*<br>(6.65)            | 20.34*<br>(5.80) | 10.77*<br>(0.86) | 16.90*<br>(0.95) | 13.16*<br>(1.92) | 19.60*<br>(8.83) | 20.70*<br>(2.82) | 22.34*<br>(2.34) | 9.29*<br>(0.45) | 15.47*<br>(0.53) | 11.34*<br>(0.45) | 7.88<br>(3.70) |
| IL-1Ra       | 4.86*<br>(3.01)                  | 2.42*<br>(0.97) | 3.23*<br>(0.60)  | 5.30*<br>(0.32)  | 1.42*<br>(0.38)  | 1.59*<br>(0.43) | 8.32 <sup>v</sup><br>(4.73) | 2.33*<br>(1.50)  | 1.82*<br>(0.80)  | 4.00*<br>(0.65)  | 4.27*<br>(0.72)  | 3.54*<br>(0.52)  | 3.47*<br>(0.37)  | 3.73*<br>(0.34)  | 1.69*<br>(0.27) | 2.96*<br>(2.19)  | 1.57*<br>(0.79)  | 4.47<br>(3.20) |

<sup>1</sup> Cytokines were measured in the supernatant of 2D and 3D monocyte cultures that were previously primed for 24 h with culture medium alone (unprimed), LPS (1 ng/mL) or AuNP (1  $\mu$ g/mL), then cultured with fresh medium for 6 additional days, and eventually challenged with LPS (10 ng/mL) for 24 h. Results are the mean values of 2-4 replicate determinations and are expressed in ng/10<sup>6</sup> cells. SD is shown in parentheses. Undetectable cytokine levels are shown as zero.

nt = not tested.

\*  $p < 0.05$  between 2D and 3D
